# Supplementary material for: Functional analysis of ESM1 by shRNA-mediated knockdown of its expression in papillary thyroid cancer cells
Source: PLOS journal article supplement (doi:10.1371/journal.pone.0298631), 2024-04-16

Supplementary explanations for Figure 3C and 3F

Supplementary explanations for Figure 3C:

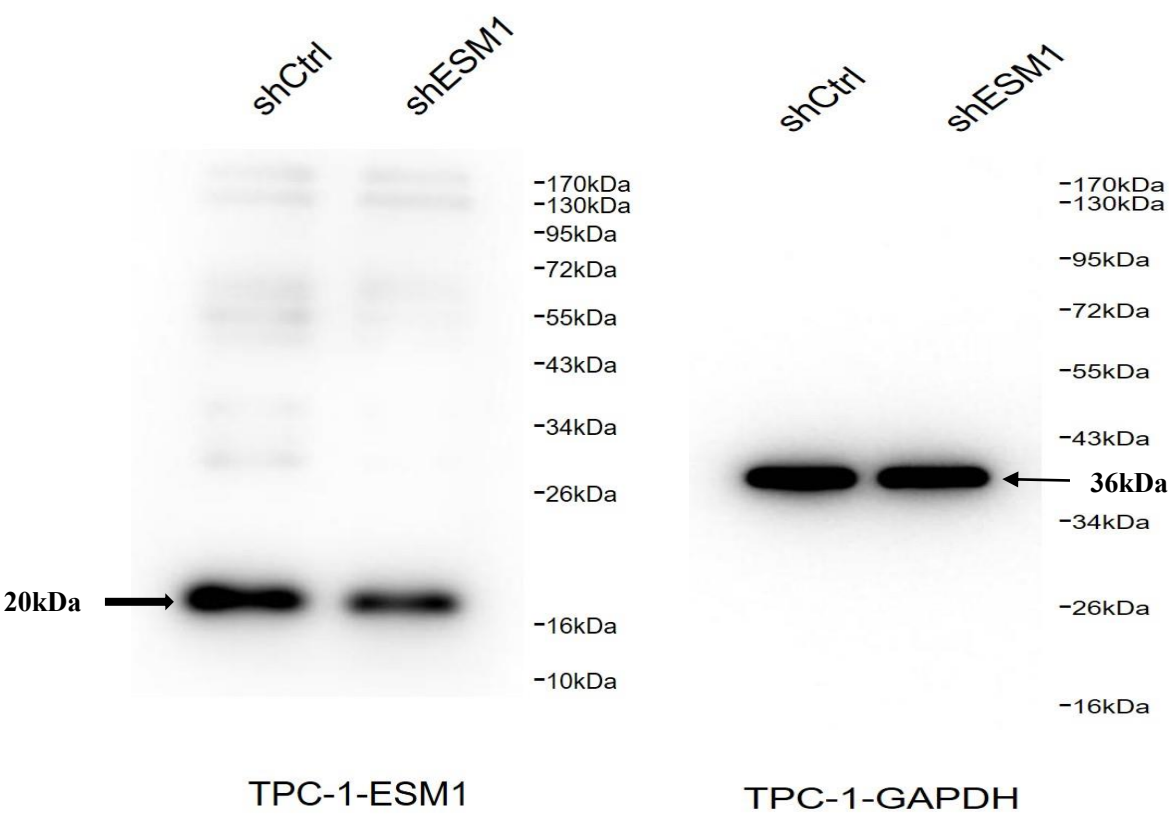

Supplementary explanations for Figure 3F:

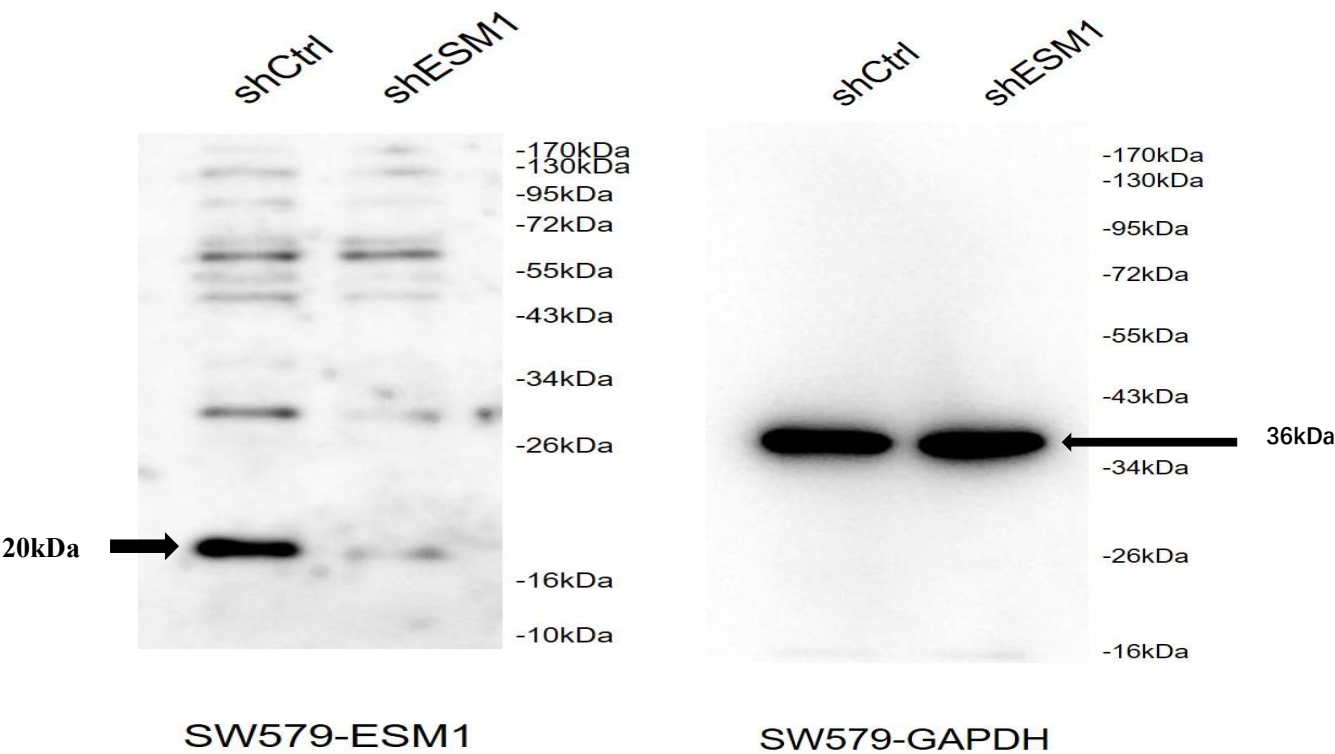

Supplement: S1 (10.1371/journal.pone.0298631.s001) [file journal.pone.0298631.s001]
